# Supplementary material for: Synthesis of copper nanowire decorated reduced graphene oxide for electro-oxidation of methanol
Source: Royal Society of Chemistry journal article supplement (doi:10.1039/c3ta10745k), 2013-01-01
Supplement: c3ta10745k.pdf [file c3ta10745k.pdf]

## *Supporting Information*

# Synthesis of copper nanowires decorated reduced graphene oxide for electro-oxidation of methanol

*Arun Prakash Periasamy,<sup>a</sup> Jifeng Liu,<sup>b</sup> Hsiu-Mei Lin,<sup>c</sup> and Huan-Tsung Chang<sup>\*a</sup>*

<sup>a</sup>Department of Chemistry, National Taiwan University, 1, Section 4, Roosevelt Road, Taipei  
106, Taiwan

<sup>b</sup>Department of Chemistry, Liaocheng University, Hunan Rd 1, Liaocheng, Shandong Province,  
CN-252059, China

<sup>c</sup>Prof. H.-M. Lin, Institute of Bioscience and Biotechnology, National Taiwan Ocean University,  
2, Pei-Ning Road, Keelung, 20224, Taiwan

**\*Corresponding author.** Tel. and fax: 011-886-2-33661171

E-mail address: changht@ntu.edu.tw (H.-T. Chang)

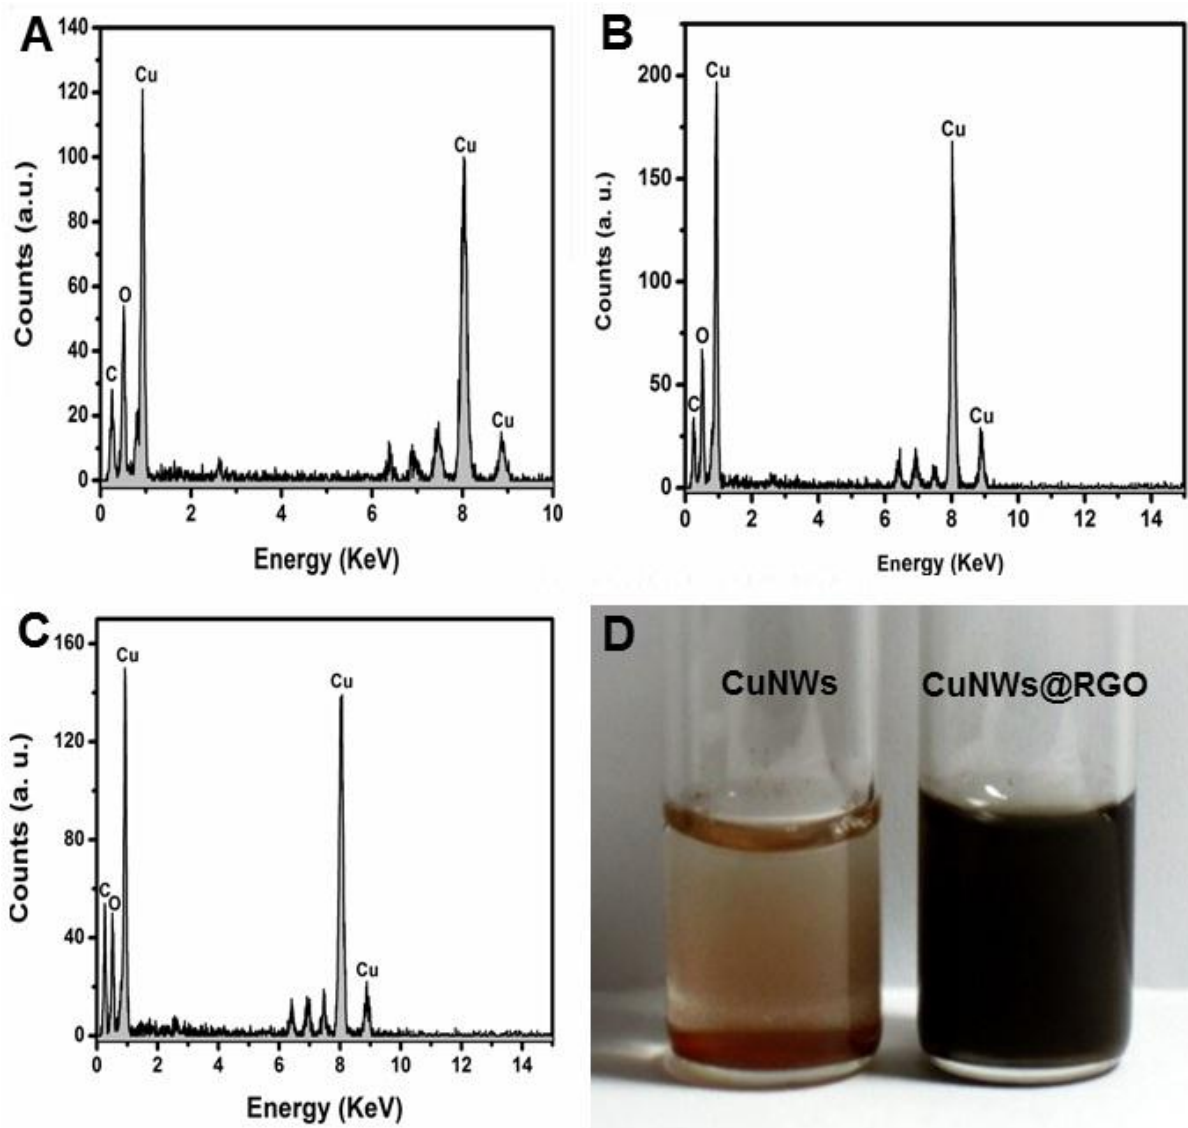

**Figure S1.** EDS patterns of (A) Cu NWs, (B) rose-like stem and (C) nano-thorns in Cu NWs@RGO, (D) photograph of Cu NWs and Cu NWs@RGO aqueous dispersions.

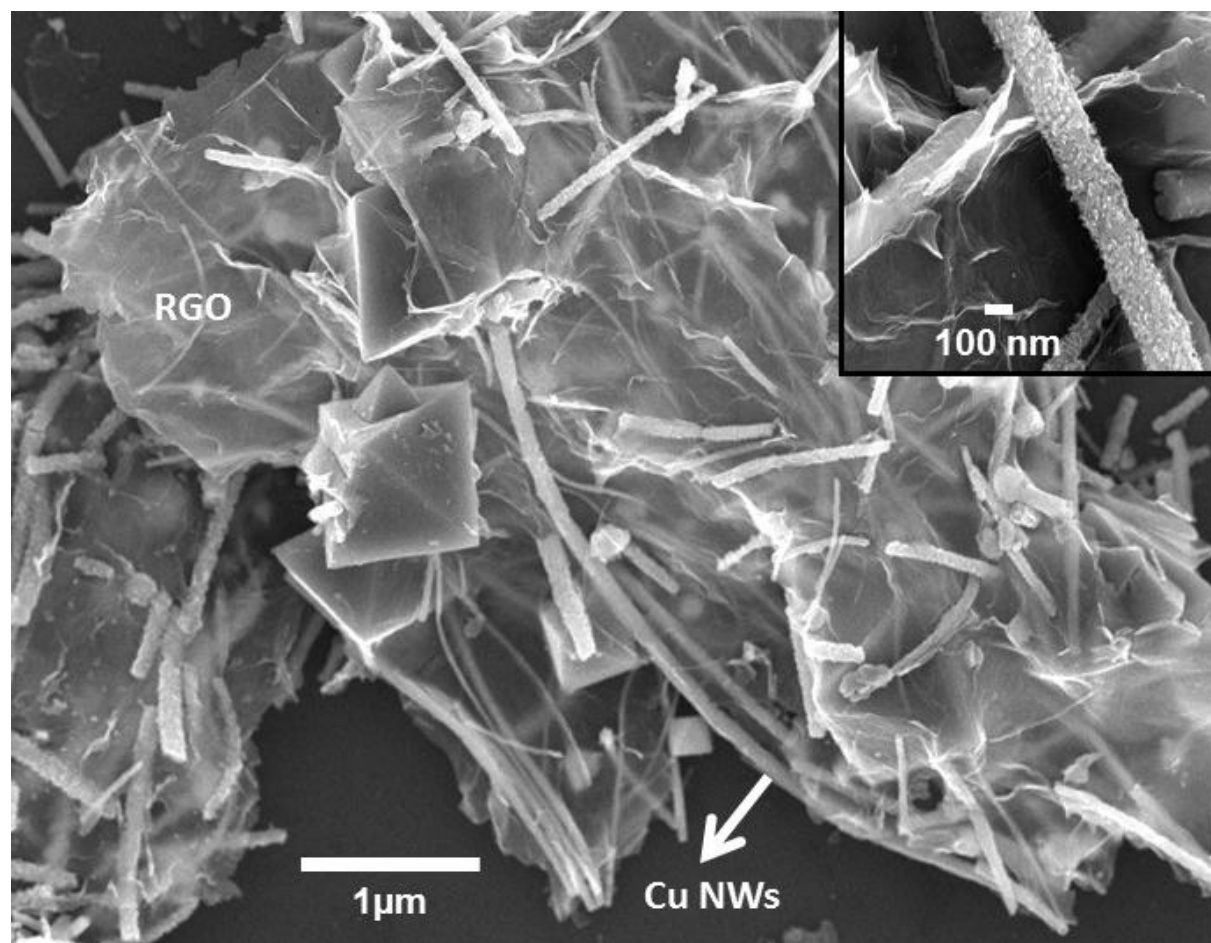

**Figure S2.** Low and high magnification (inset) SEM image of Cu NWs@RGO.

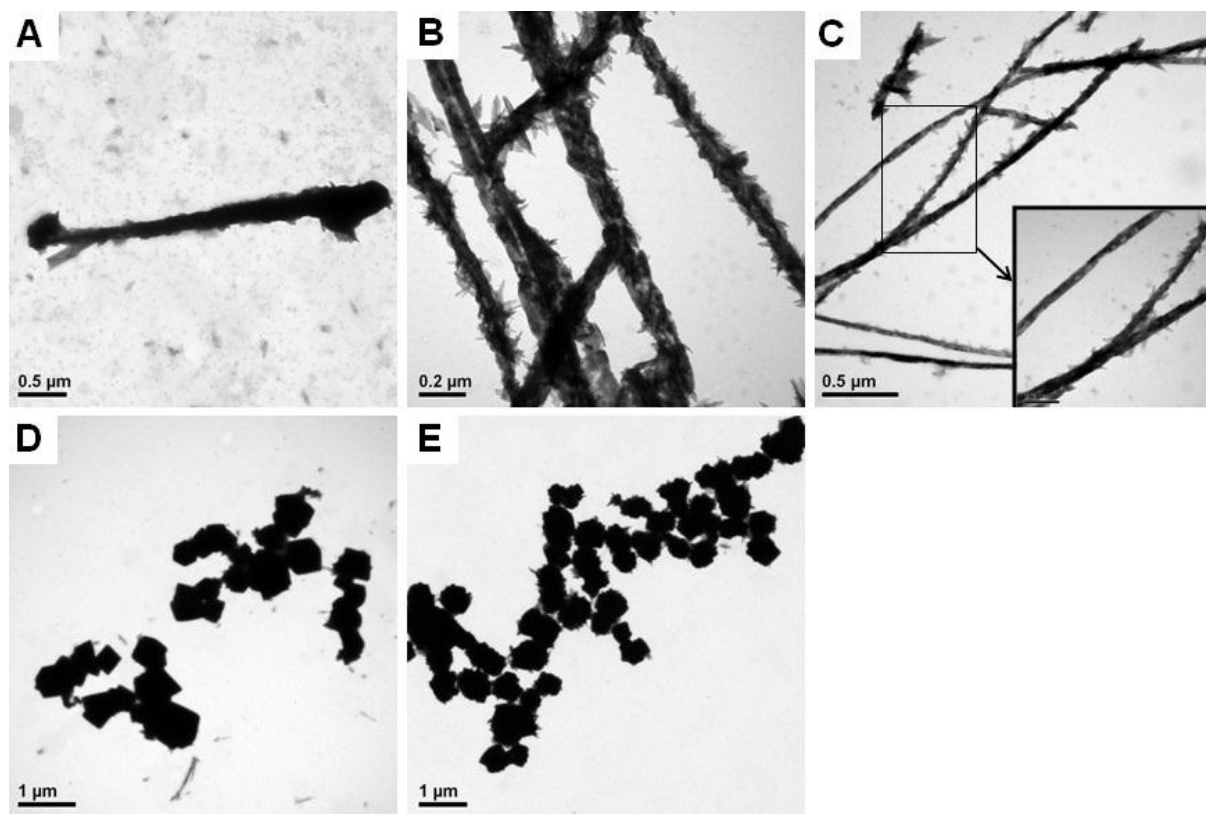

**Figure S3.** Representative TEM images of hierarchical Cu NWs and Cu nano cubes grown using different EDA concentrations: (A) 1.75, (B) 3.45, (C) 5.65 (D) 8.3, and (E) 10.8 mM. The final concentrations used were catechin (6 mM) and NaOH (13 M). The scale bar shown in the inset to (C) corresponds to 200 nm.

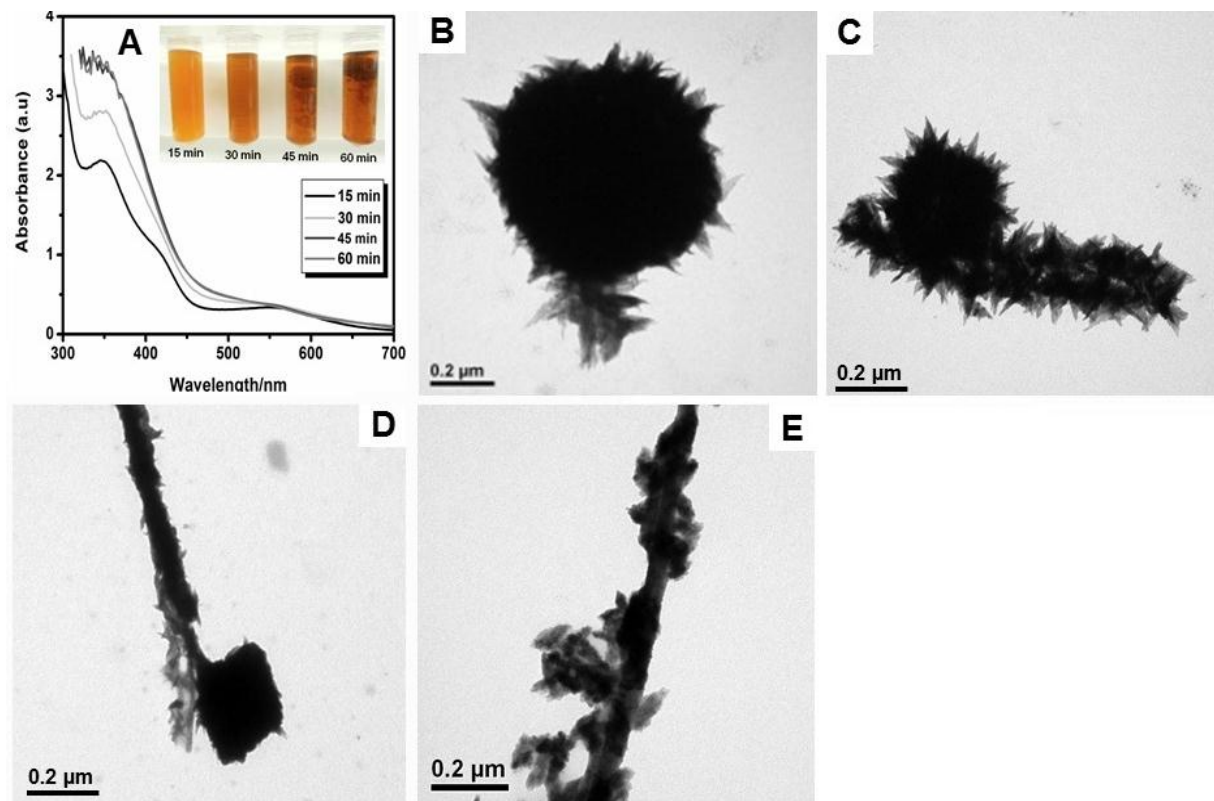

**Figure S4.** (A) Time dependent UV-visible spectra of Cu NWs growth solution at various reaction intervals. Time-evolution TEM images obtained for various reaction times (B) 15 (C) 30 (D) 45 and (E) 60 min. Inset to (A): Photograph of the corresponding solutions.

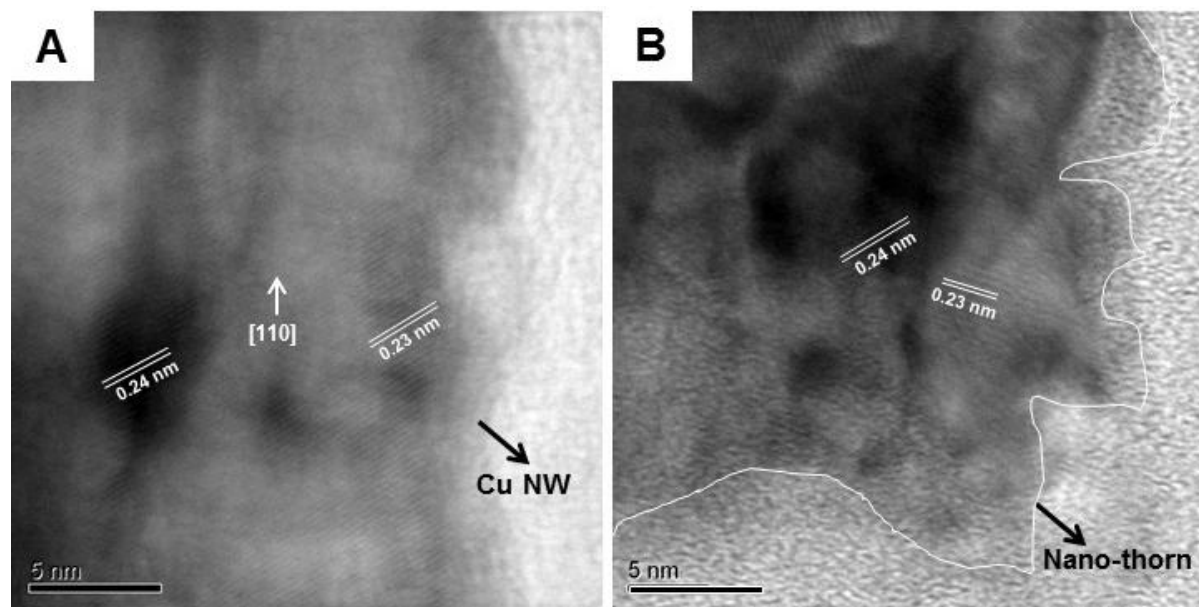

**Figure S5.** HRTEM images of (A) Cu NW and (B) nano-thorns in a Cu NW. To show a clear view of a nano-thorn, a thin guideline is provided in (B).

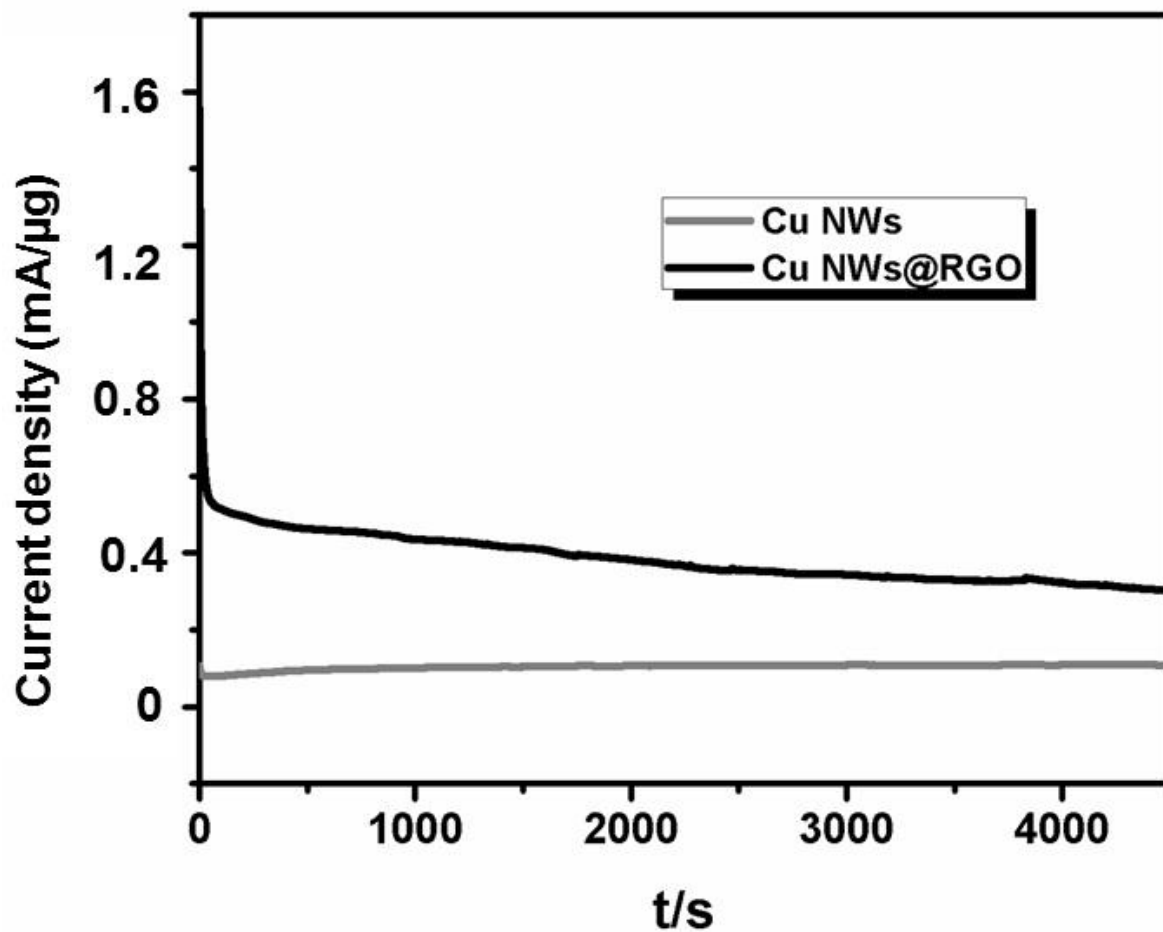

**Figure S6.** Chronoamperograms of Cu NWs@RGO and Cu NWs for methanol oxidation in methanol solution (1.0 M) containing 0.1 M NaOH at a fixed potential of 1.0 V.
